# Supplementary material
Source: publisher figshare collection journal article supplement (https://tandf.figshare.com/ndownloader/files/15086813)
Supplement: Supplementary file 1 [file 15086813]

*Supporting Information for:*

Electrochemical polymerization in chiral liquid crystal on diffraction  
grating producing electro-active polymer with diffraction function:  
A combination of top-down and top-bottom techniques

Yuki Kudo, Naoto Eguchi, Hiromasa Goto\*

Department of Materials Science, Faculty of Pure and Applied Sciences,  
University of Tsukuba, Tsukuba, Ibaraki 305-8573, Japan

E-mail: gotoh@ims.tsukuba.ac.jp

Synthesis of monomer

*ter*EDOT was prepared using a previously reported method (Goto, H. (2009) *J. Mater. Chem.*, 19, 4914–4921). MT-F-MT (Scheme S1) was prepared as follows. In a round-bottom flask, 4-tributylstannyl-3-methyl thiophene (1.626 g, 4.2 mmol), 2,7-dibromo-9,9-dimethyl-9*H*-fluorene (0.704 g, 2.0 mmol), and tetrakis(triphenylphosphine)palladium(0) (PPh<sub>3</sub>)<sub>4</sub> in 7 mL of toluene were stirred under N<sub>2</sub> gas flow at 90 °C for 6 h. The crude product was purified by column chromatography (silica gel, CHCl<sub>3</sub>/hexane = 3/17) to yield 0.323 g of the desired material. <sup>1</sup>H nuclear magnetic resonance (NMR) and <sup>13</sup>C NMR spectroscopy measurements (Figure S1) confirmed the chemical structure of MT-F-MT.

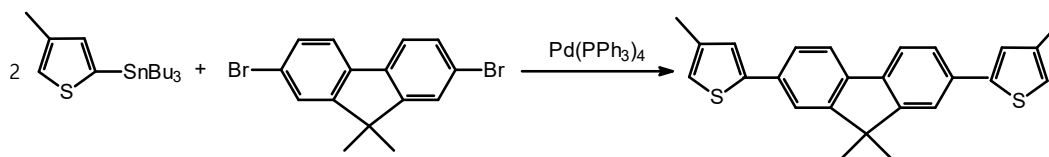

Scheme S1. Synthesis of MT-F-MT as a monomer.

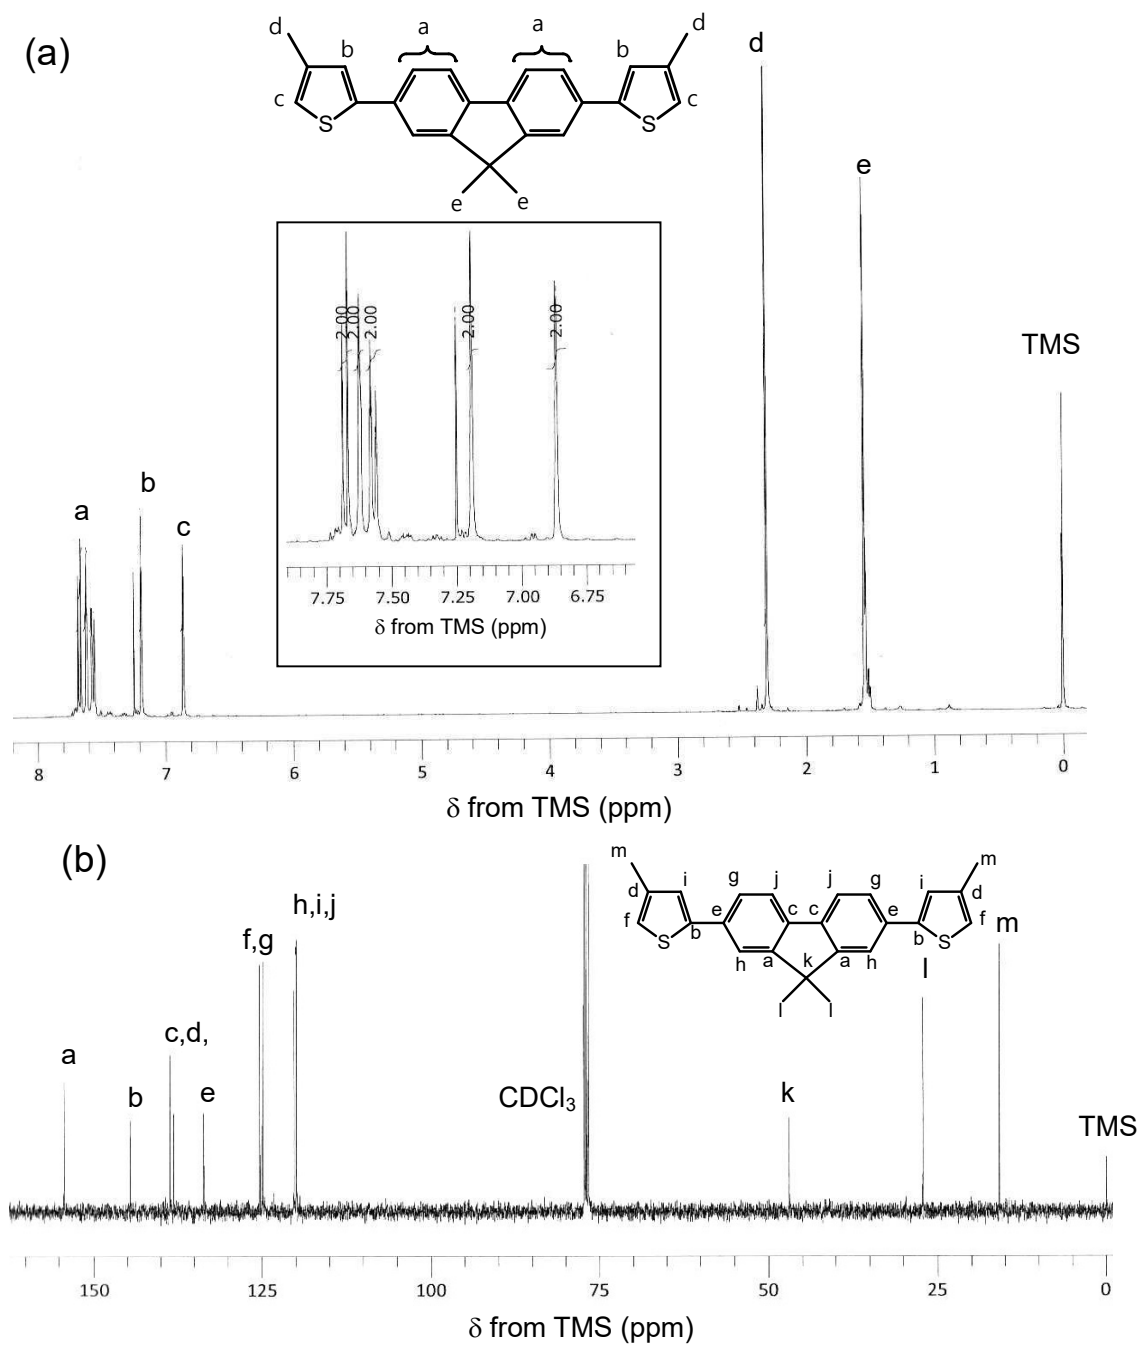

Figure S1. (a)  $^1\text{H}$  NMR spectrum of MT-F-MT as a monomer. Inset shows low magnetic field. (b)  $^{13}\text{C}$  NMR spectrum of MT-F-MT. Solvent:  $\text{CDCl}_3$ , TMS = tetramethylsilane as an internal standard.

## Techniques

Chemicals were purchased from Tokyo Chemical Industry (TCI; Tokyo). Reagents were used as-received. Toluene (solvent, Nakalai Tesque, Kyoto) was distilled prior to use.  $^1\text{H}$  NMR spectroscopy (ECS 400, JEOL) measurements were performed in  $\text{CDCl}_3$  with an. Chemical shifts are reported in ppm down-field from TMS as an internal reference. Optical texture observations were conducted using a high-resolution polarizing microscope (ECLIPS LV 100, Nikon) with a LU Plan Fluor lens and a CFIUW lens (Nikon). Digital pictures were recorded with an Optio RZ10 (Pentax) camera. UV-vis absorption spectra were recorded on a UV-vis optical absorption spectrometer (V-630, Jasco). Electrochemical measurements were performed using an electrochemical analyzer (PGSTAT 12, AUTOLAB). Circular dichroism (CD) spectra were obtained with a J-720 spectrometer (Jasco).
